# Supplementary material
Source: PubMed Central journal article supplement (PMC10303083)
Supplement: NIHMS1906307-supplement-reporting_summary.pdf [file NIHMS1906307-supplement-reporting_summary.pdf]

## Reporting Summary

Nature Portfolio wishes to improve the reproducibility of the work that we publish. This form provides structure for consistency and transparency in reporting. For further information on Nature Portfolio policies, see our [Editorial Policies](#) and the [Editorial Policy Checklist](#).

### Statistics

For all statistical analyses, confirm that the following items are present in the figure legend, table legend, main text, or Methods section.

n/a | Confirmed

- The exact sample size ( $n$ ) for each experimental group/condition, given as a discrete number and unit of measurement
- A statement on whether measurements were taken from distinct samples or whether the same sample was measured repeatedly
- The statistical test(s) used AND whether they are one- or two-sided  
*Only common tests should be described solely by name; describe more complex techniques in the Methods section.*
- A description of all covariates tested
- A description of any assumptions or corrections, such as tests of normality and adjustment for multiple comparisons
- A full description of the statistical parameters including central tendency (e.g. means) or other basic estimates (e.g. regression coefficient) AND variation (e.g. standard deviation) or associated estimates of uncertainty (e.g. confidence intervals)
- For null hypothesis testing, the test statistic (e.g.  $F$ ,  $t$ ,  $r$ ) with confidence intervals, effect sizes, degrees of freedom and  $P$  value noted  
*Give  $P$  values as exact values whenever suitable.*
- For Bayesian analysis, information on the choice of priors and Markov chain Monte Carlo settings
- For hierarchical and complex designs, identification of the appropriate level for tests and full reporting of outcomes
- Estimates of effect sizes (e.g. Cohen's  $d$ , Pearson's  $r$ ), indicating how they were calculated

*Our web collection on [statistics for biologists](#) contains articles on many of the points above.*

### Software and code

Policy information about [availability of computer code](#)

Data collection

BD FACSDiva software (LSRII and Fortessa) or SpectroFlo (Cytek Aurora) was used to collect flow cytometry data. Slidebook 6(3i) was used to collect confocal microscopy data.

Data analysis

Flowjo 10.8.0 for FACS; GraphPad 9.2.0 for statistics; slidebook 6 was used for microscope images; Affymetrix Expression Console v1.1; limma v.3.34.9; Trim Galore (version 0.5.0); Bowtie 2 (version 2.3.5.1); Picard MarkDuplicates function (version 2.19.0); SAMtools (version 1.9); BamTools (version 2.5.1); MACS (version 2.1.2); BEDTools (version 2.27.1); bedGraphToBigWig (version 377); deepTools plotHeatmap (version 3.2.1); DiffBind (version 2.16.0); ChIPseeker (version 1.26.2); clusterProfiler (version 3.18.1); STAR (version 2.7.5a) for sequencing data.

For manuscripts utilizing custom algorithms or software that are central to the research but not yet described in published literature, software must be made available to editors and reviewers. We strongly encourage code deposition in a community repository (e.g. GitHub). See the Nature Portfolio [guidelines for submitting code & software](#) for further information.

## Data

Policy information about [availability of data](#)

All manuscripts must include a [data availability statement](#). This statement should provide the following information, where applicable:

- Accession codes, unique identifiers, or web links for publicly available datasets
- A description of any restrictions on data availability
- For clinical datasets or third party data, please ensure that the statement adheres to our [policy](#)

RNA-seq, nascent RNA-seq, Cut&Run, ATAC-seq and CHIP-seq data that support the findings of this study have been deposited in the Gene Expression Omnibus (GEO; <https://www.ncbi.nlm.nih.gov/geo/>) under accession number GSE189563.

## Human research participants

Policy information about [studies involving human research participants and Sex and Gender in Research](#).

### Reporting on sex and gender

*Use the terms sex (biological attribute) and gender (shaped by social and cultural circumstances) carefully in order to avoid confusing both terms. Indicate if findings apply to only one sex or gender; describe whether sex and gender were considered in study design whether sex and/or gender was determined based on self-reporting or assigned and methods used. Provide in the source data disaggregated sex and gender data where this information has been collected, and consent has been obtained for sharing of individual-level data; provide overall numbers in this Reporting Summary. Please state if this information has not been collected. Report sex- and gender-based analyses where performed, justify reasons for lack of sex- and gender-based analysis.*

### Population characteristics

*Describe the covariate-relevant population characteristics of the human research participants (e.g. age, genotypic information, past and current diagnosis and treatment categories). If you filled out the behavioural & social sciences study design questions and have nothing to add here, write "See above."*

### Recruitment

*Describe how participants were recruited. Outline any potential self-selection bias or other biases that may be present and how these are likely to impact results.*

### Ethics oversight

*Identify the organization(s) that approved the study protocol.*

Note that full information on the approval of the study protocol must also be provided in the manuscript.

## Field-specific reporting

Please select the one below that is the best fit for your research. If you are not sure, read the appropriate sections before making your selection.

Life sciences       Behavioural & social sciences       Ecological, evolutionary & environmental sciences

For a reference copy of the document with all sections, see [nature.com/documents/nr-reporting-summary-flat.pdf](https://nature.com/documents/nr-reporting-summary-flat.pdf)

## Life sciences study design

All studies must disclose on these points even when the disclosure is negative.

### Sample size

No sample size was pre-determined. Sample sizes were chosen according to commonly used standards in the field. The number of independent experiments are indicated in the legend of each figure. Proper negative and whenever possible positive controls were used for each experiment.

### Data exclusions

No data were excluded.

### Replication

All the experimental finding were reproduced as validated by at least two independent experiments. For CHIP-seq and CUT&RUN experiment, at least two replicates were collected for each group.

### Randomization

This is not relevant since we did not use different experimental groups or conditions in our study.

### Blinding

The investigators were not blinded to group allocation during data collection or analysis, as there was no subjective measurement in our experiments. This approach is considered standard for experiments of the type performed in this study.

## Reporting for specific materials, systems and methods

We require information from authors about some types of materials, experimental systems and methods used in many studies. Here, indicate whether each material, system or method listed is relevant to your study. If you are not sure if a list item applies to your research, read the appropriate section before selecting a response.

## Materials & experimental systems

## Methods

- n/a  Involved in the study
- Antibodies
- Eukaryotic cell lines
- Palaeontology and archaeology
- Animals and other organisms
- Clinical data
- Dual use research of concern

- n/a  Involved in the study
- ChIP-seq
- Flow cytometry
- MRI-based neuroimaging

## Antibodies

### Antibodies used

For WB: H3 (CST, 9715, 1: 10,000); S10P H3 (Millipore, 06-570, 1:1,000); RNA POLII (Bethyl, A300-653A, 1: 500); SOX2 (R&D Systems, AF2018, 1: 200); EZH2 (CST, 5246, 1: 1,000); SUZ12 (CST, 3737, 1: 1,000); EED (Millipore, 17-10034, 1: 1,000); ARID2 (SIGMA, SAB2702340-100UL, 1: 1,000); PBRM1 (Bethyl, A700-019, 1: 1,000); SMARCE1 (Bethyl, A300-810A, 1: 1,000); SMARCB1 (Bethyl, A301-087A, 1: 1,000); ARID1A (CST, 12354, 1: 1,000), DPF2 (Invitrogen, PA5-21079, 1: 1,000); BRD9 (Active Motif, 61537, 1: 1,000); SMARCA4 (CST, 49360, 1: 1,000); SNRP70 (Abcam, ab83306, 1: 1,000); BRD7 (CST, 14910, 1: 1,000); SMARCC1 (CST, 11956, 1: 1,000). For ChIP-seq: Five micrograms of antibodies to the following were used: H3K4me3 (CST, 9751S); H3K27ac (Abcam, ab4729); H3K4me1 (Abcam, ab8895); H3K27me3 (CST, 9733); H3K36me3 (CST, 4909); H3K9me3 (Active Motif, 39161); H4K20me3 (Active Motif, 39671); SOX2 (R&D systems, AF2018), CTCF (Abcam, ab70303). For CUT&RUN: 0.5 ug primary antibodies against SOX2 (R&D systems, AF2018), ESRRB (R&D systems, PP-H6705-00), EZH2 (CST, 5246), ARID1A (SIGMA, HPA005456-100UL), SMARCA4 (Abcam, ab110641), BRD9 (Active Motif, 61537), SMARCB1 (Bethyl, A301-087A), SMARCE1 (Bethyl, A300-810A). For IHC: OCT4 (Santa Cruz, sc-5279, 1: 50); SOX2 (R&D Systems, AF2018, 1: 20); NANOG (Active Motif, 61419, 1: 200), ESRRB (R&D Systems, PP-H6705-00, 1: 100); SOX1 (R&D Systems, AF3369, 1: 20), NES (MILLIPORE, MAB353, 1: 50), GABA (Invitrogen, PA5-32241, 1: 100), GFAP (Abcam, ab7260, 1: 1,000). For flow cytometry: 5 ul of PE anti-Histone H3 Phospho (Ser10) Antibody (BioLegend #650808) or PE Mouse IgG2b, κ Isotype Ctrl Antibody (BioLegend #400314) for 1 million cells.

### Validation

The specificities of listed FACS antibodies have been validated by the manufacturer by flow cytometry.  
The specificities of listed WB antibodies have been validated by the manufacturer by western blot.  
The specificities of listed imaging antibodies have been validated by the manufacturer by imaging.

## Eukaryotic cell lines

### Policy information about cell lines and Sex and Gender in Research

#### Cell line source(s)

All cell lines (Sox2-Egfp, Smarca4-Egfp, Smarcb1-Egfp, Smarce1-Egfp, Smarce1-MD, Smarce1-MD (R42A), Smarce1-AID) were derived from AB2.2 mouse embryonic stem cells (<https://www.atcc.org/products/scrc-1023>).

#### Authentication

Sox2-Egfp, Smarca4-Egfp, Smarcb1-Egfp, Smarce1-Egfp, Smarce1-MD, Smarce1-MD (R42A), Smarce1-AID were authenticated by PRC-genotyping and western blot. Smarce1-MD, Smarce1-MD (R42A) were also authenticated by Sanger-sequencing. Mitosis-specific degenon (MD) and its mutant degenon cells and Smarce1-AID mouse ES cells were authenticated by western blot after releasing from mitosis.

#### Mycoplasma contamination

All cell lines tested negative for mycoplasma contamination.

#### Commonly misidentified lines (See [ICLAC](#) register)

Cells used are not in the ICLAC database.

## ChIP-seq

### Data deposition

- Confirm that both raw and final processed data have been deposited in a public database such as [GEO](#).
- Confirm that you have deposited or provided access to graph files (e.g. BED files) for the called peaks.

#### Data access links

*May remain private before publication.*

All sequencing data that support the findings of this study have been deposited in NCBI's Gene Expression Omnibus (GEO) under accession number GSE189563 (including CUT&RUN, RNA-seq, ATAC-seq and nascent RNA-seq data).

#### Files in database submission

raw data (.fastq) were provided for the following samples:  
asynchronous mESCs\_input\_1940854  
asynchronous mESCs\_H3K4me1\_1940855  
asynchronous mESCs\_H3K9me3\_1940856  
mitotic mESCs\_input\_1940863  
mitotic mESCs\_H3K4me1\_1940864

mitotic mESCs\_H3K9me3\_1940865  
asynchronous mESCs\_input\_1884805  
asynchronous mESCs\_SOX2\_1884812  
mitotic mESCs\_input\_1884813  
mitotic mESCs\_SOX2\_1884820  
asynchronous mESCs\_input\_1951682  
asynchronous mESCs\_H3K4me1\_1951683  
asynchronous mESCs\_H3K9me3\_1951684  
mitotic mESCs\_input\_1951688  
mitotic mESCs\_H3K4me1\_1951689  
mitotic mESCs\_H3K9me3\_1951690  
asynchronous mESCs\_input\_1951694  
asynchronous mESCs\_H3K4me3\_1951695  
asynchronous mESCs\_H3K27me3\_1951696  
asynchronous mESCs\_H3K27ac\_1951697  
mitotic mESCs\_input\_1951699  
mitotic mESCs\_H3K4me3\_1951700  
mitotic mESCs\_H3K27me3\_1951701  
mitotic mESCs\_H3K27ac\_1951702  
asynchronous mESCs\_input\_1951704  
asynchronous mESCs\_H3K4me3\_1951705  
asynchronous mESCs\_H3K27me3\_1951706  
asynchronous mESCs\_H3K27ac\_1951707  
mitotic mESCs\_input\_1951709  
mitotic mESCs\_H3K4me3\_1951710  
mitotic mESCs\_H3K27me3\_1951711  
mitotic mESCs\_H3K27ac\_1951712  
asynchronous mESCs\_input\_1983265  
asynchronous mESCs\_H3K4me1\_1983266  
mitotic mESCs\_input\_1983270  
mitotic mESCs\_H3K4me1\_1983271  
asynchronous mESCs\_input\_1983275  
asynchronous mESCs\_H3K4me1\_1983276  
mitotic mESCs\_input\_1983280  
mitotic mESCs\_H3K4me1\_1983281  
asynchronous mESCs\_input\_1996870  
asynchronous mESCs\_H3K4me3\_1996871  
asynchronous mESCs\_H3K27me3\_1996872  
asynchronous mESCs\_H3K27ac\_1996873  
mitotic mESCs\_input\_1996875  
mitotic mESCs\_H3K4me3\_1996876  
mitotic mESCs\_H3K27me3\_1996877  
mitotic mESCs\_H3K27ac\_1996878  
asynchronous mESCs\_input\_1996880  
asynchronous mESCs\_H3K4me3\_1996881  
asynchronous mESCs\_H3K27me3\_1996882  
asynchronous mESCs\_H3K27ac\_1996883  
mitotic mESCs\_input\_1996885  
mitotic mESCs\_H3K4me3\_1996886  
mitotic mESCs\_H3K27me3\_1996887  
mitotic mESCs\_H3K27ac\_1996888  
asynchronous mESCs\_input\_2163925  
asynchronous mESCs\_H3K9me3\_2163926  
asynchronous mESCs\_H4K20me3\_2163927  
asynchronous mESCs\_H4K20me3\_2163928  
asynchronous mESCs\_H3K36me3\_2163930  
mitotic mESCs\_input\_2163931  
mitotic mESCs\_H3K9me3\_2163932  
mitotic mESCs\_H4K20me3\_2163933  
mitotic mESCs\_H4K20me3\_2163934  
mitotic mESCs\_H3K36me3\_2163936  
asynchronous mESCs\_input\_2163937  
asynchronous mESCs\_H3K9me3\_2163938  
asynchronous mESCs\_H4K20me3\_2163939  
asynchronous mESCs\_H4K20me3\_2163940  
asynchronous mESCs\_H3K36me3\_2163942  
mitotic mESCs\_input\_2163943  
mitotic mESCs\_H3K9me3\_2163944  
mitotic mESCs\_H4K20me3\_2163945  
mitotic mESCs\_H4K20me3\_2163946  
mitotic mESCs\_H3K36me3\_2163948  
asynchronous mESCs\_input\_1910803  
asynchronous mESCs\_SOX2\_1910806  
mitotic mESCs\_input\_1910815  
mitotic mESCs\_SOX2\_1910818  
asynchronous mESCs\_input\_1938701

asynchronous mESCs\_CTCF\_1938706  
 mitotic mESCs\_input\_1938710  
 mitotic mESCs\_CTCF\_1938715  
 asynchronous mESCs\_input\_1940854  
 asynchronous mESCs\_CTCF\_1940859  
 mitotic mESCs\_input\_1940863  
 mitotic mESCs\_CTCF\_1940868

Genome browser session  
 (e.g. [UCSC](#))

<https://proteinpaint.stjude.org/chipreview.html>

## Methodology

|                         |                                                                                                                                                                                                                                                                                                                                                                                                                                                                                                                             |
|-------------------------|-----------------------------------------------------------------------------------------------------------------------------------------------------------------------------------------------------------------------------------------------------------------------------------------------------------------------------------------------------------------------------------------------------------------------------------------------------------------------------------------------------------------------------|
| Replicates              | ChIP-seq, RNA-seq, nascent RNA-seq and CUT&RUN were performed with at least two independent biological replicates as indicated in figure legends.                                                                                                                                                                                                                                                                                                                                                                           |
| Sequencing depth        | 51bp single-end and paired-end reads of ChIP-seq, > 50 million reads for each sample<br>Raw reads of all samples above have been deposited in NCBI's Gene Expression Omnibus (GEO) under accession number GSE189563 where the sequencing depth information is available.                                                                                                                                                                                                                                                    |
| Antibodies              | Five micrograms of antibodies to the following were used: H3K4me3 (CST, 9751S); H3K27ac (Abcam, ab4729); H3K4me1 (Abcam, ab8895); H3K27me3 (CST, 9733); H3K36me3 (CST, 4909); H3K9me3 (Active Motif, 39161); H4K20me3 (Active Motif, 39671); SOX2 (R&D systems, AF2018), CTCF (Abcam, ab70303).                                                                                                                                                                                                                             |
| Peak calling parameters | stringent peaks for each replicate were called by MACS2 (V 2.1.1.20160309, with default parameters using Input as control) and filtered with fold enrichment cutoff: 5 and p-value threshold: 1e-9. Peaks that overlapped within replicates were merged (bedtools, V2.17.0, overlap cutoff: 1bp) and the merged peaks were kept as high-confidence peaks for further analysis.                                                                                                                                              |
| Data quality            | Library complexity, cross-correlation, MultiQC and FastQC was tested.                                                                                                                                                                                                                                                                                                                                                                                                                                                       |
| Software                | Reads were trimmed with Trim Galore (version 0.6.0) with default parameters.<br>Reads were aligned to mouse mm10 using BWA (version 0.7.17, default parameters)<br>Duplicate reads were marked by bamsormadup (biobambam2, V2.0.87).<br>Uniquely mapped reads for ChIP-seq were obtained using samtools (V0.1.18), with parameter "-q 10 -F1024".<br>MACS (version 2.1.1) was used to call peaks with default parameters using Input as control.<br>RPM was applied to the normalized read counts to generate bigwig tracks |

## Flow Cytometry

### Plots

Confirm that:

- The axis labels state the marker and fluorochrome used (e.g. CD4-FITC).
- The axis scales are clearly visible. Include numbers along axes only for bottom left plot of group (a 'group' is an analysis of identical markers).
- All plots are contour plots with outliers or pseudocolor plots.
- A numerical value for number of cells or percentage (with statistics) is provided.

### Methodology

|                    |                                                                                                                                                                                                                                                                                                                                                                                                                                                                                                                                                                                                                                                                                                                                                                                                                                                                                                                                                                                                                                                                                                                                                                                                                                                                                                                                                                                                                                                                                                                                                                                                                                                                                                                                                                                                                                                                                                                                                                                                                                                       |
|--------------------|-------------------------------------------------------------------------------------------------------------------------------------------------------------------------------------------------------------------------------------------------------------------------------------------------------------------------------------------------------------------------------------------------------------------------------------------------------------------------------------------------------------------------------------------------------------------------------------------------------------------------------------------------------------------------------------------------------------------------------------------------------------------------------------------------------------------------------------------------------------------------------------------------------------------------------------------------------------------------------------------------------------------------------------------------------------------------------------------------------------------------------------------------------------------------------------------------------------------------------------------------------------------------------------------------------------------------------------------------------------------------------------------------------------------------------------------------------------------------------------------------------------------------------------------------------------------------------------------------------------------------------------------------------------------------------------------------------------------------------------------------------------------------------------------------------------------------------------------------------------------------------------------------------------------------------------------------------------------------------------------------------------------------------------------------------|
| Sample preparation | For cell cycle analysis, 3x10 <sup>6</sup> cells/sample were collected and washed twice in cell suspension buffer (PBS+ 2% FBS) and fixed with 5 ml cold 70% ethanol for at least 1 hour at 4oC. Cells were then washed twice in cold PBS and resuspended in 1 ml of 50 µg/ml propidium iodide (PI)/PBS buffer supplemented with 0.5 µg/ml RNase A and incubated overnight at 4oC. Samples were analyzed by 17-color LSR Fortessa (4 Lasers) in the St. Jude flow core. Data were analyzed by FlowJo (Version 10. 7. 1).<br>for Phospho S10 Histone 3 Staining: 1x10 <sup>6</sup> cells were collected and fixed in the dark for 20 minutes at room temperature with 0.5 ml fixation buffer (BioLegend #420801). Then cells were treated with 1 ml of Intracellular Staining Perm Wash Buffer (BioLegend #421002) twice. Cells were resuspended in 100 µl of Intracellular Staining Perm Wash Buffer supplemented with 5 µl of PE anti-Histone H3 Phospho (Ser10) Antibody (BioLegend #650808) or PE Mouse IgG2b, κ Isotype Ctrl Antibody (BioLegend #400314) and incubated for 20 min in the dark at room temperature. Next, cells were washed twice with 2 ml of Intracellular Staining Perm Wash Buffer, resuspended in 0.5 ml of cell suspension buffer, and analyzed by 17-color LSR Fortessa (4 Lasers). Data were analyzed by FlowJo (Version 10. 7. 1).<br>For cell proliferation: Cells were analyzed following the protocol for the BD Pharmingen BrdU flow kit (APC-BrdU) (552598). Briefly, 1x 10 <sup>6</sup> cells were cultured in 1 ml mESC culture medium and supplemented with 10 µl of 1 mM BrdU solution. The treated cells were incubated for 30 min at 37oC, 5% CO <sub>2</sub> in the incubator. Cells were fixed by BD Cytofix/Cytoperm Buffer and Permeabilized by BD Cytoperm Permeabilization Buffer, and then labelled with APC-conjugated anti-BrdU antibody. After washing, cells were resuspended in 7-AAD solution and analyzed by 17-color LSR Fortessa (4 Lasers). Data were analyzed by FlowJo (Version 10. 7. 1). |
| Instrument         | LSRII, Fortessa (BD Bioscience) or Aurora (Cytek)                                                                                                                                                                                                                                                                                                                                                                                                                                                                                                                                                                                                                                                                                                                                                                                                                                                                                                                                                                                                                                                                                                                                                                                                                                                                                                                                                                                                                                                                                                                                                                                                                                                                                                                                                                                                                                                                                                                                                                                                     |
| Software           | Flowjo 10.8.0                                                                                                                                                                                                                                                                                                                                                                                                                                                                                                                                                                                                                                                                                                                                                                                                                                                                                                                                                                                                                                                                                                                                                                                                                                                                                                                                                                                                                                                                                                                                                                                                                                                                                                                                                                                                                                                                                                                                                                                                                                         |

Cell population abundance

Purity is computer determined by. A value of % total between 80-90% is obtained. The % total is the % of cells sorted on the stream out of all sorted cells.

Gating strategy

Based on the pattern of FSC-A/SSC-A. Singlets were gated according to the pattern of FSC-H vs. FSC-A. Positive populations were determined by the specific antibodies, which were distinct from negative populations.

Tick this box to confirm that a figure exemplifying the gating strategy is provided in the Supplementary Information.
