# Supplementary material
Source: PubMed Central journal article supplement (PMC10303083)
Supplement: NIHMS1906307-supplement-Supplementary_Fig_1_and_Supp_table_2.pdf [file NIHMS1906307-supplement-Supplementary_Fig_1_and_Supp_table_2.pdf]

Figure 1a

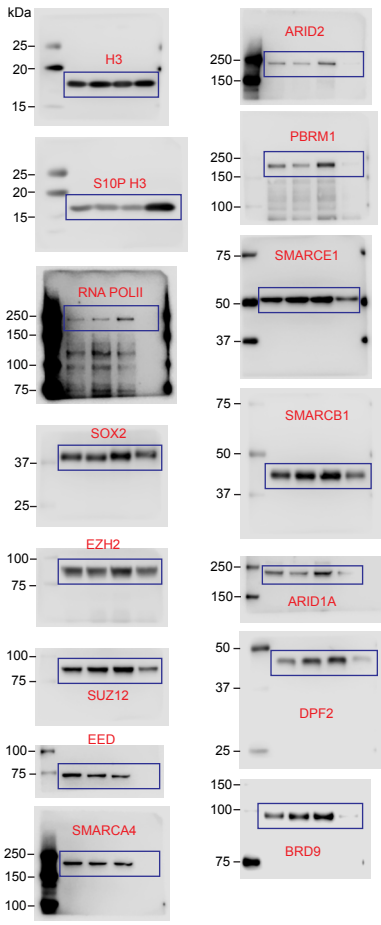

Figure 1b

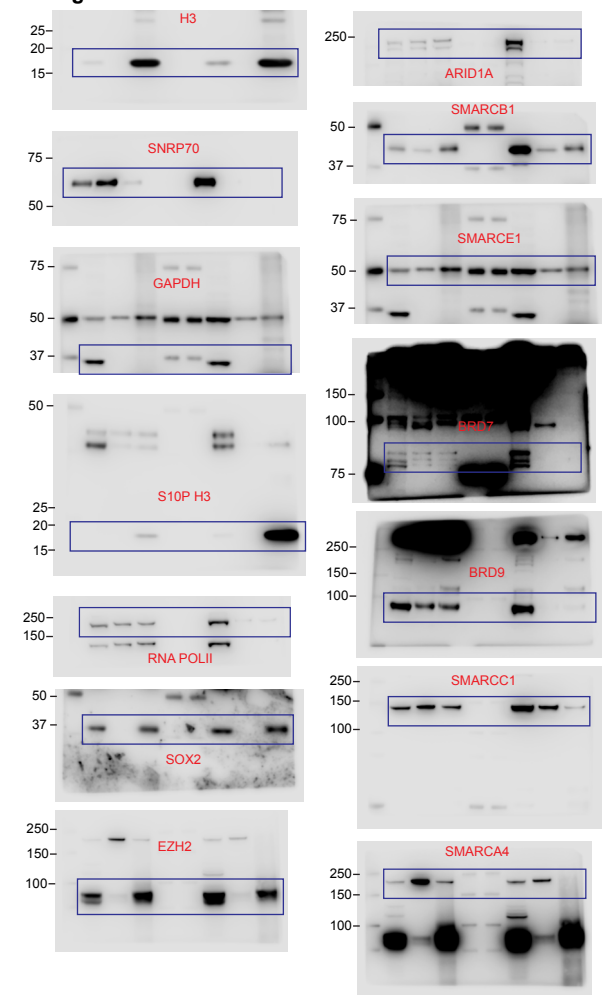

Extended Data Figure 1g

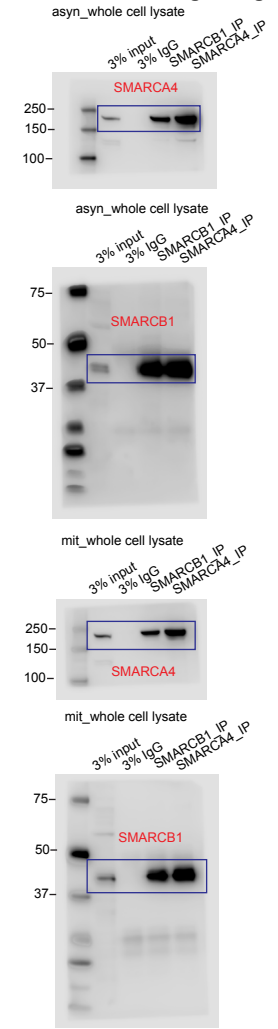

Extended Data Figure 1h

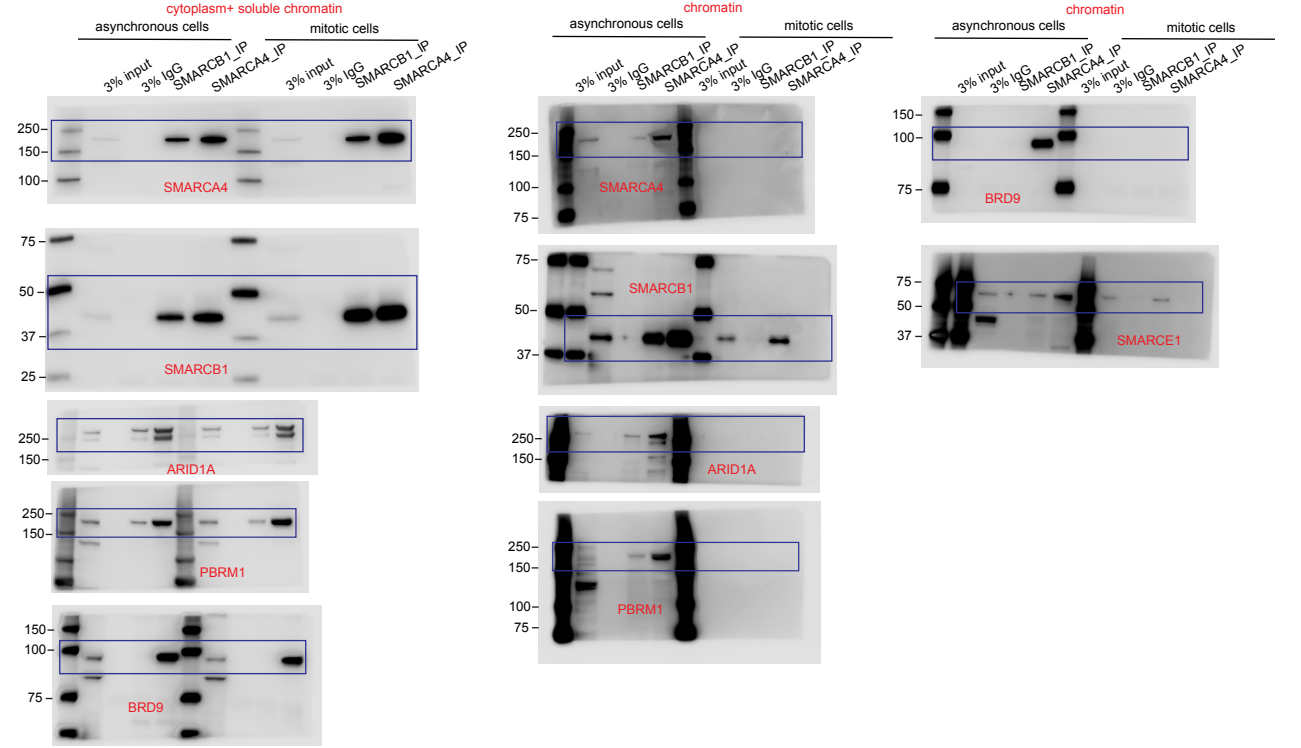

Extended Data Figure 1i

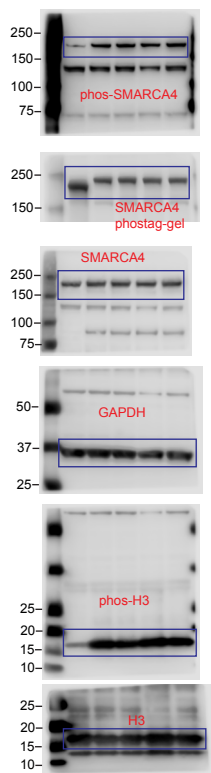

Extended Data Figure 1j

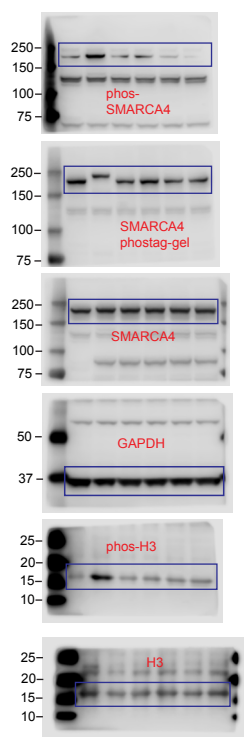

Extended Data Figure 1k

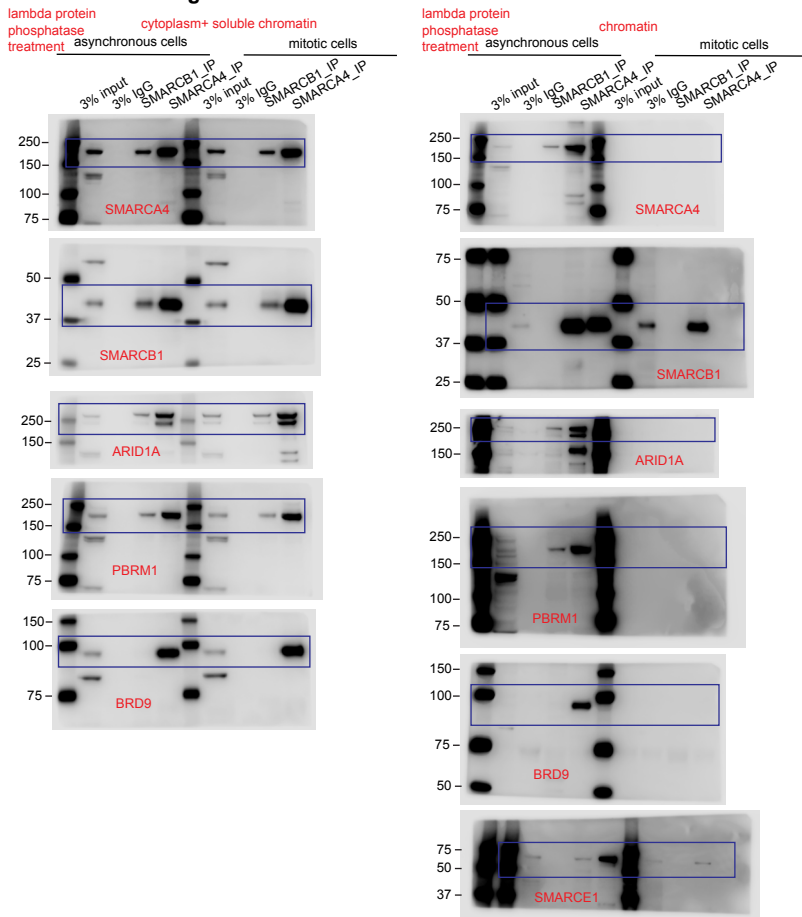

Extended Data Figure 2f

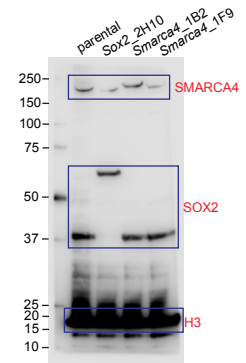

Extended Data Figure 2g

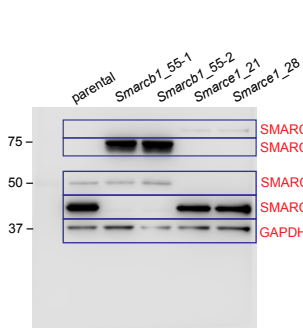

Extended Data Figure 2h (continued)

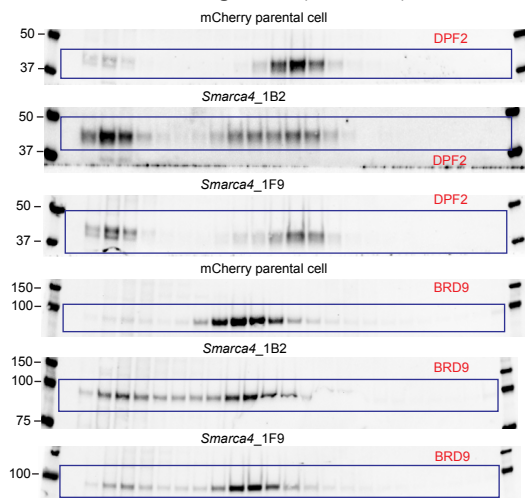

Extended Data Figure 2h

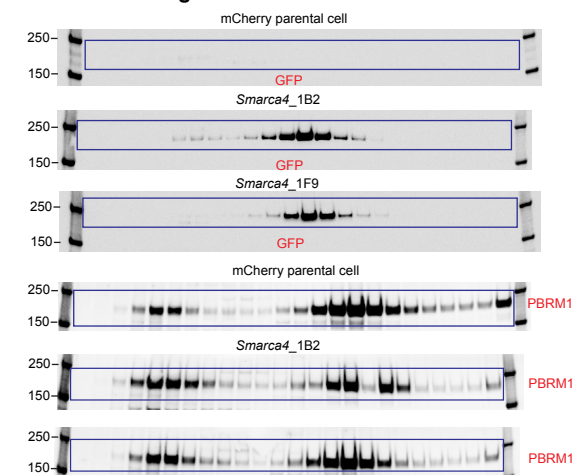

**Extended Data Figure 2i**

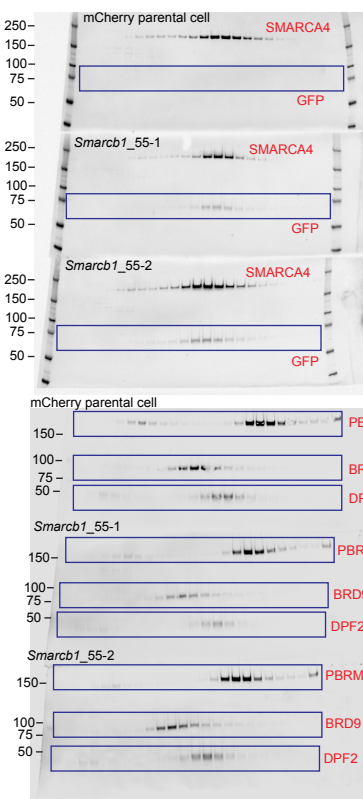

**Extended Data Figure 2j**

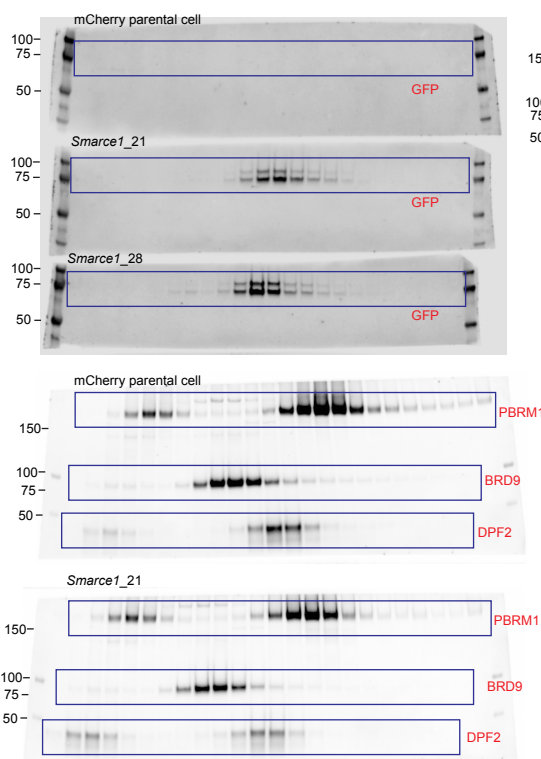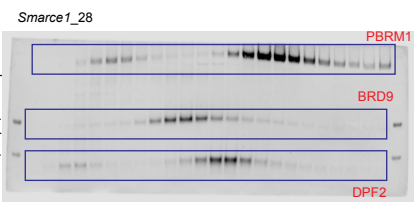

**Extended Data Figure 6c**

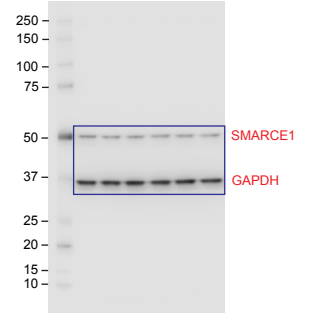

**Extended Data Figure 7b**

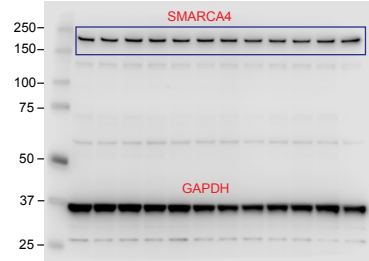

**Extended Data Figure 5e**

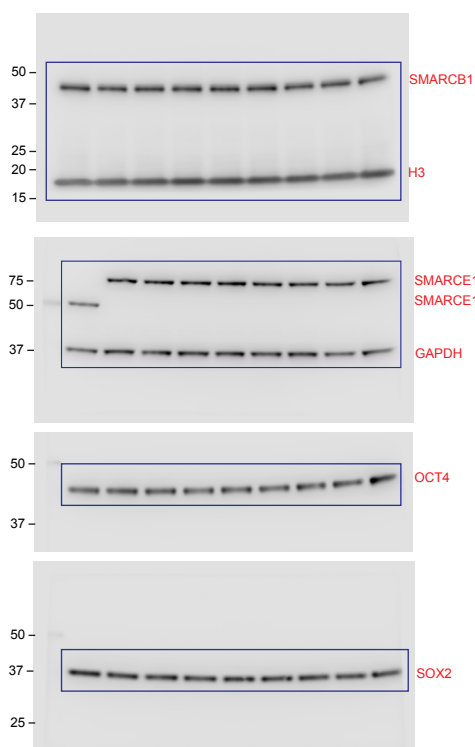

**Extended Data Figure 6b**

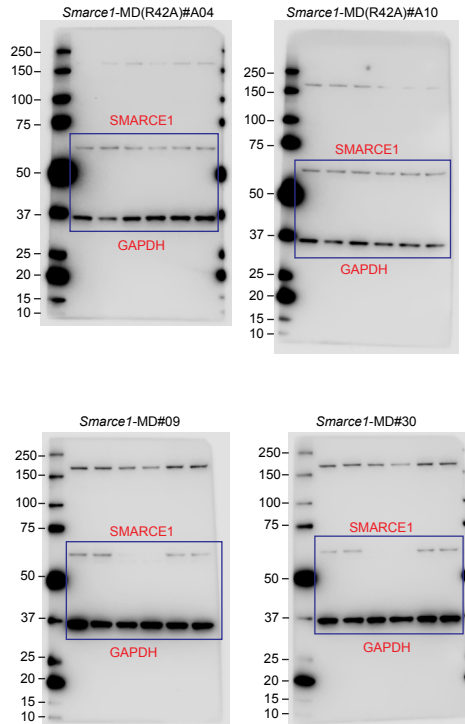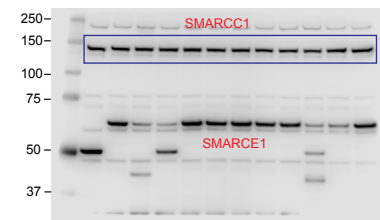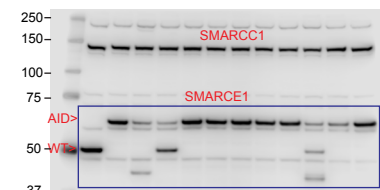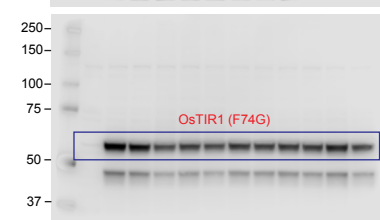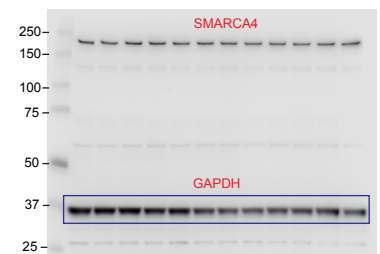

Extended Data Figure 7c

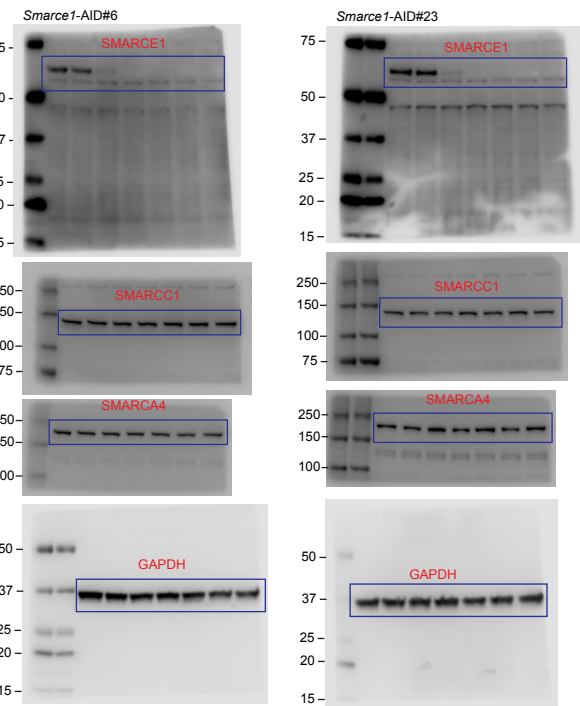

Extended Data Figure 7e

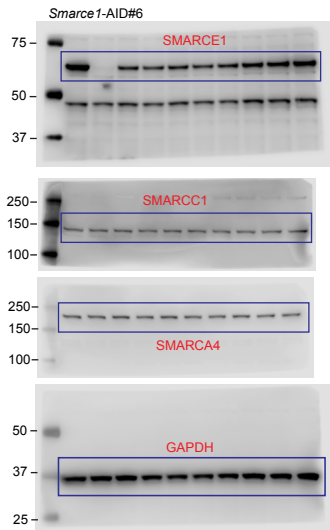

Extended Data Figure 7e (continued)

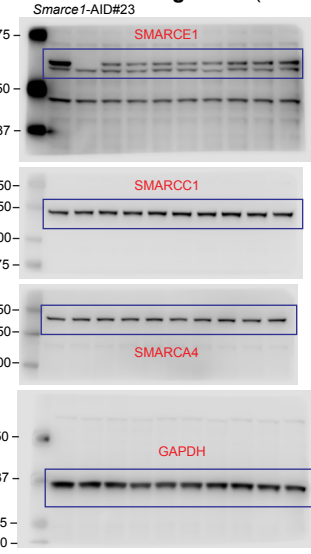

Extended Data Figure 8b

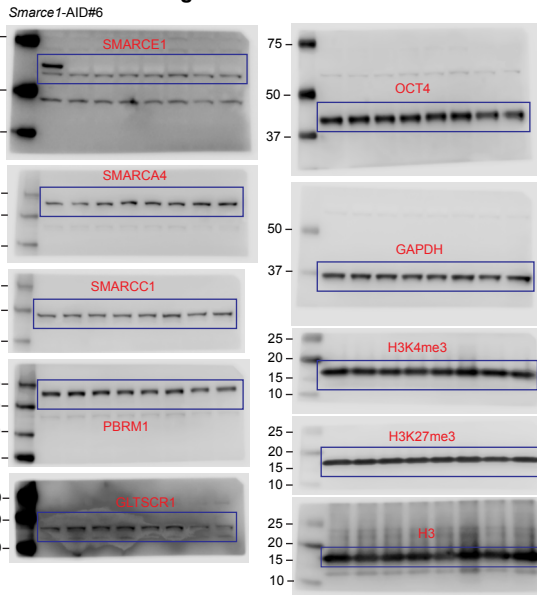

Extended Data Figure 8b (continued)

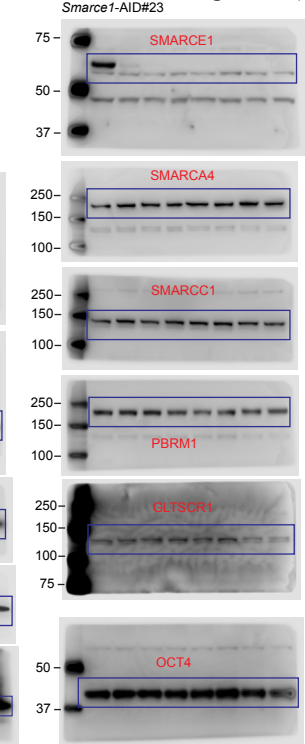

Extended Data Figure 8b (continued)

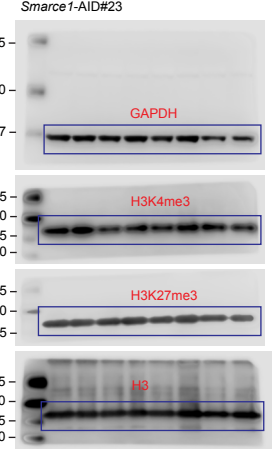

Extended Data Figure 9e

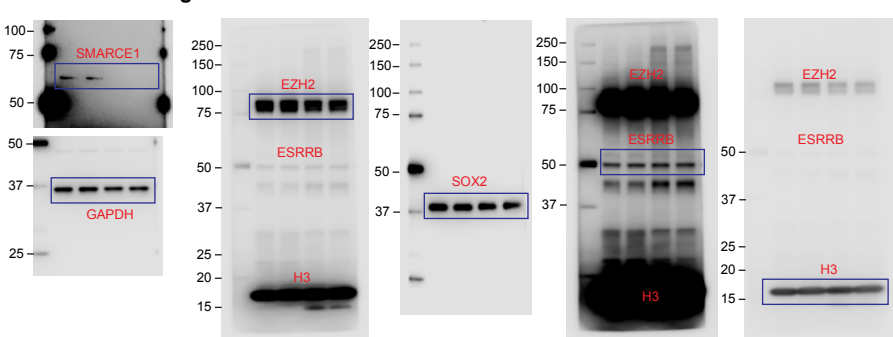

## Supplementary Table 2. qPCR primers

### qPCR primers for neuroectoderm markers

| name  | forward                | reverse              |
|-------|------------------------|----------------------|
| Gapdh | GGAGAGTGTTTCCTCGTCCC   | GATGGGCTTCCCGTTGATGA |
| Sox1  | TCTCCAACCTCTCAGGGCTACA | TTGACCAGAGATCCGAGGGC |
| Sip1  | CCTGCCTCCAGACACTCTTG   | GGAGAAAAAGGTGGAGGCCA |
| Gbx2  | AGACGGCAAAGCCTTCTTGG   | TTGCCCTTCGGGTCATCTTC |
| Olig3 | AAGCTCTCCAAGATCGCCAC   | GTCCCCCGTAGATCTCTCCA |
| Pax6  | CACCAGACTCACCTGACACC   | TCACTCCGCTGTGACTGTTC |
| Nes   | GGGCCACTCCCTTCTCTAGT   | AAGATTCTTCCCCGACGCAA |

### The primers for Cut& Run-qPCR

| name    | forward                  | reverse                |
|---------|--------------------------|------------------------|
| ID2     | TGGGTTTGGATATGCGGCTT     | CAAATGTGGGAGGACAGGCT   |
| SMARCD1 | CCTGCTTTCCAGGTCCTTGT     | AACAGGCAGACACGTGAGAG   |
| GSTM7   | TGAGTGCCAAGAGCGAAAGG     | CAGTCCTACAGCGGAAACCC   |
| MUP4    | TGGCTGAACAAGCCTGCATA     | TCCCTTTGTTTTGGCTGGGT   |
| CLEC11A | AAGAGCTAAGGCCCCGAAAC     | GGTCACCGCGTTCTAACTT    |
| PDCD10  | GCCTACTCCGAAGCAACAGTA    | CCAGCCGGCTAAAAGAGCTAA  |
| MYH10   | CCCGACGCAATAGAGAGACG     | ATCGCCGATCTTGTTGGGG    |
| VWA3B   | ATAGCCCTATTGTGGCAATGCTAA | TGGGCGGAAGAATCAGGTCTA  |
| CDK2    | TTGAAACAATGTTGCCGCTT     | GCCCTCGTGACGTGAACC     |
| PTMA    | TCACTTGCCATTGTTGCGGA     | CTAGTCCCGGCGCTATTGG    |
| RPL7    | TTGCTGGCGCAAATGAACAG     | CGCAACCTGGAGAAATTAAGCC |
| GM26654 | CCTGAAGTCCAAGCAAGCCTA    | TCCTGACCAGCCTGGGTTAT   |
